# Supplementary material for: Thiolated Chitosan as an Intestinal Absorption Carrier with Hesperidin Encapsulation for Obesity Treatment
Source: MDPI journal article supplement (doi:10.3390/nu13124405), 2021-12-09
Supplement: s1 [file s1]

ND

HFD

HFD + CT

HFD + CTH

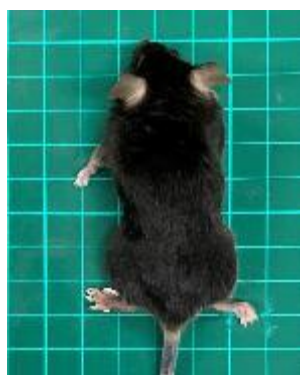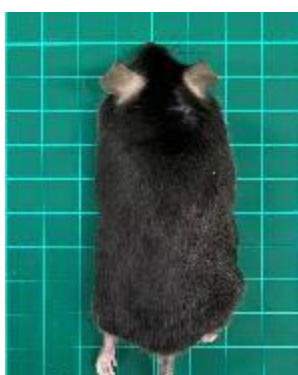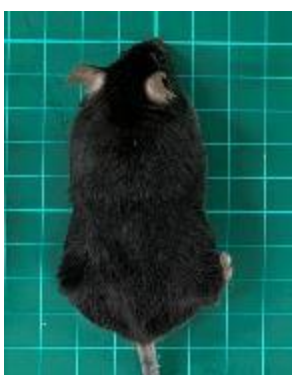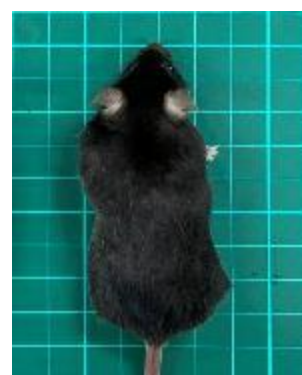

**Figure S1. Representative images of the control group, the HFD group, HFD + CT group and the HFD + CTH group**

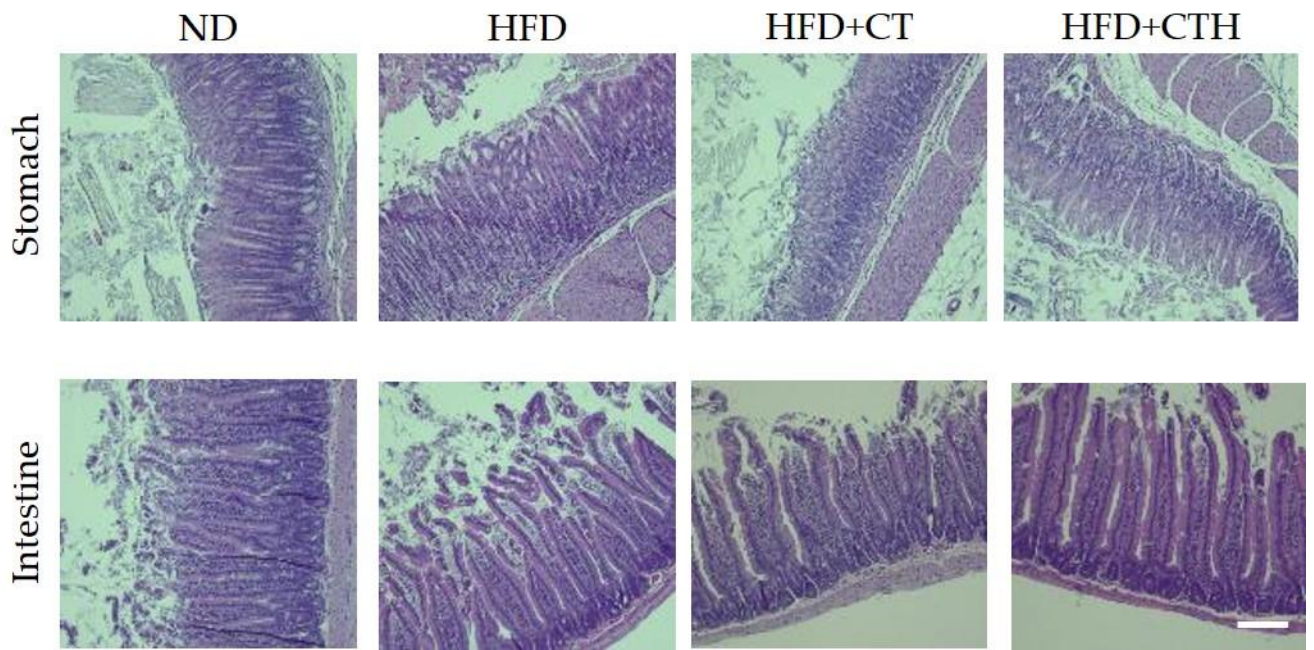

**Figure S2. H&E staining of stomach and small intestine.**  
(scale bar = 100  $\mu\text{m}$ )

|                           | OD     | Concentration (mM) |
|---------------------------|--------|--------------------|
| Chitosan-TGA<br>(2 mg/mL) | 1.6048 | 0.8583             |

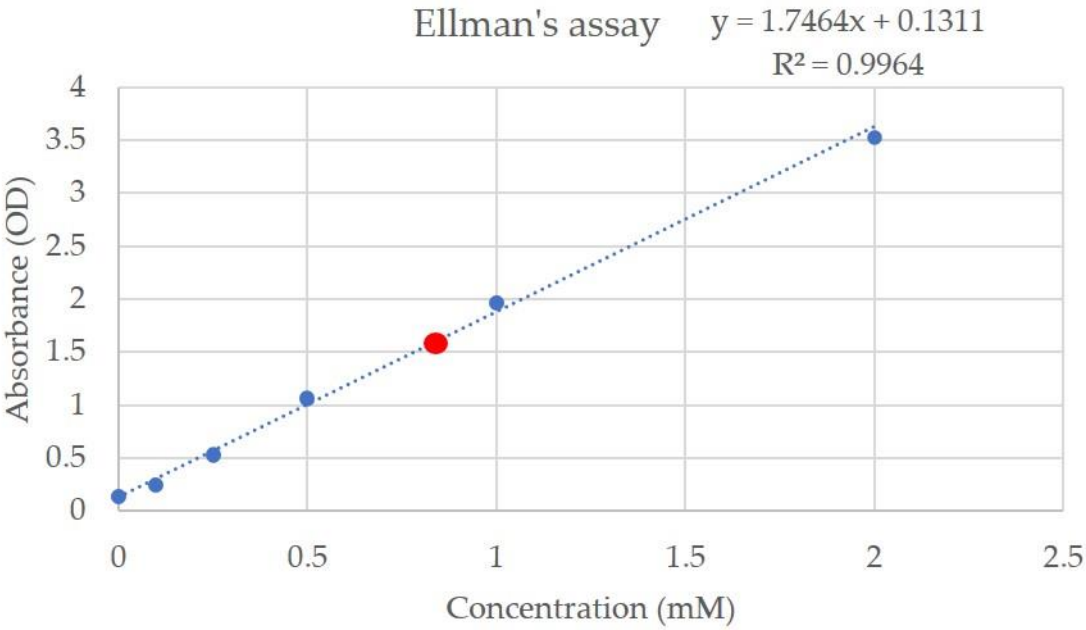

**Figure S3. Ellman's assay of CT**

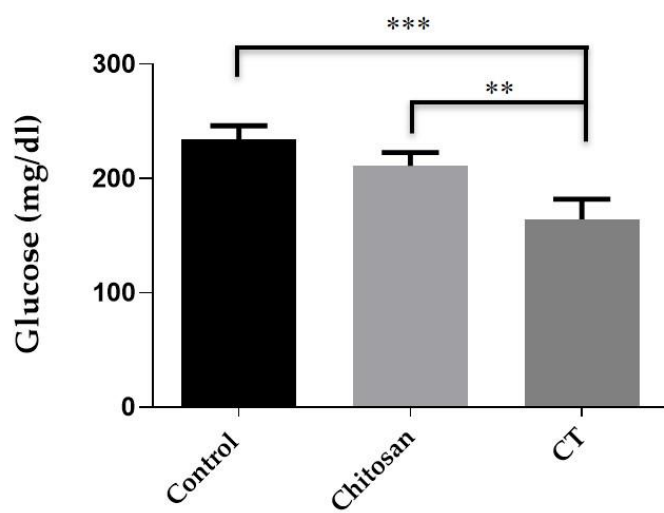

**Figure S4. The glucose barrier functional test**  
n = 6 for each group, \*\*P < 0.01, \*\*\*P < 0.005

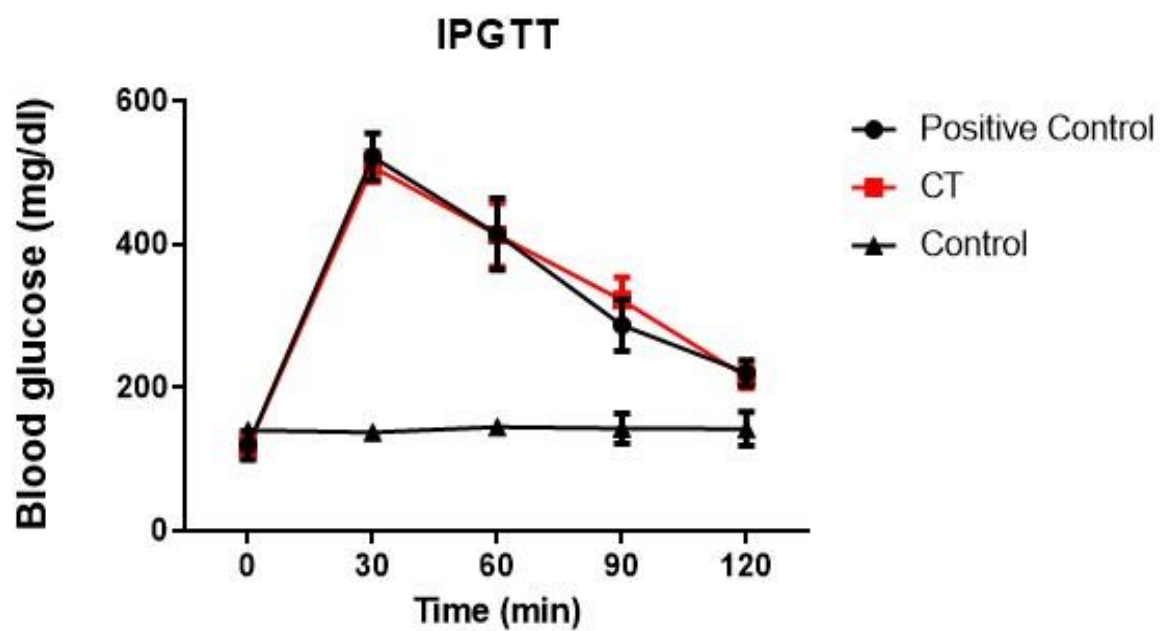

**Figure S5. IPGTT**  
n = 3 for each group
